# Supplementary material for: Recent Advances in Endothelial Progenitor Cells Toward Their Use in Clinical Translation
Source: PubMed Central journal article supplement (PMC6305310; doi:10.3389/fmed.2018.00354), 2018-12-18
Supplement: Data_Sheet_1.pdf [file Data_Sheet_1.pdf]

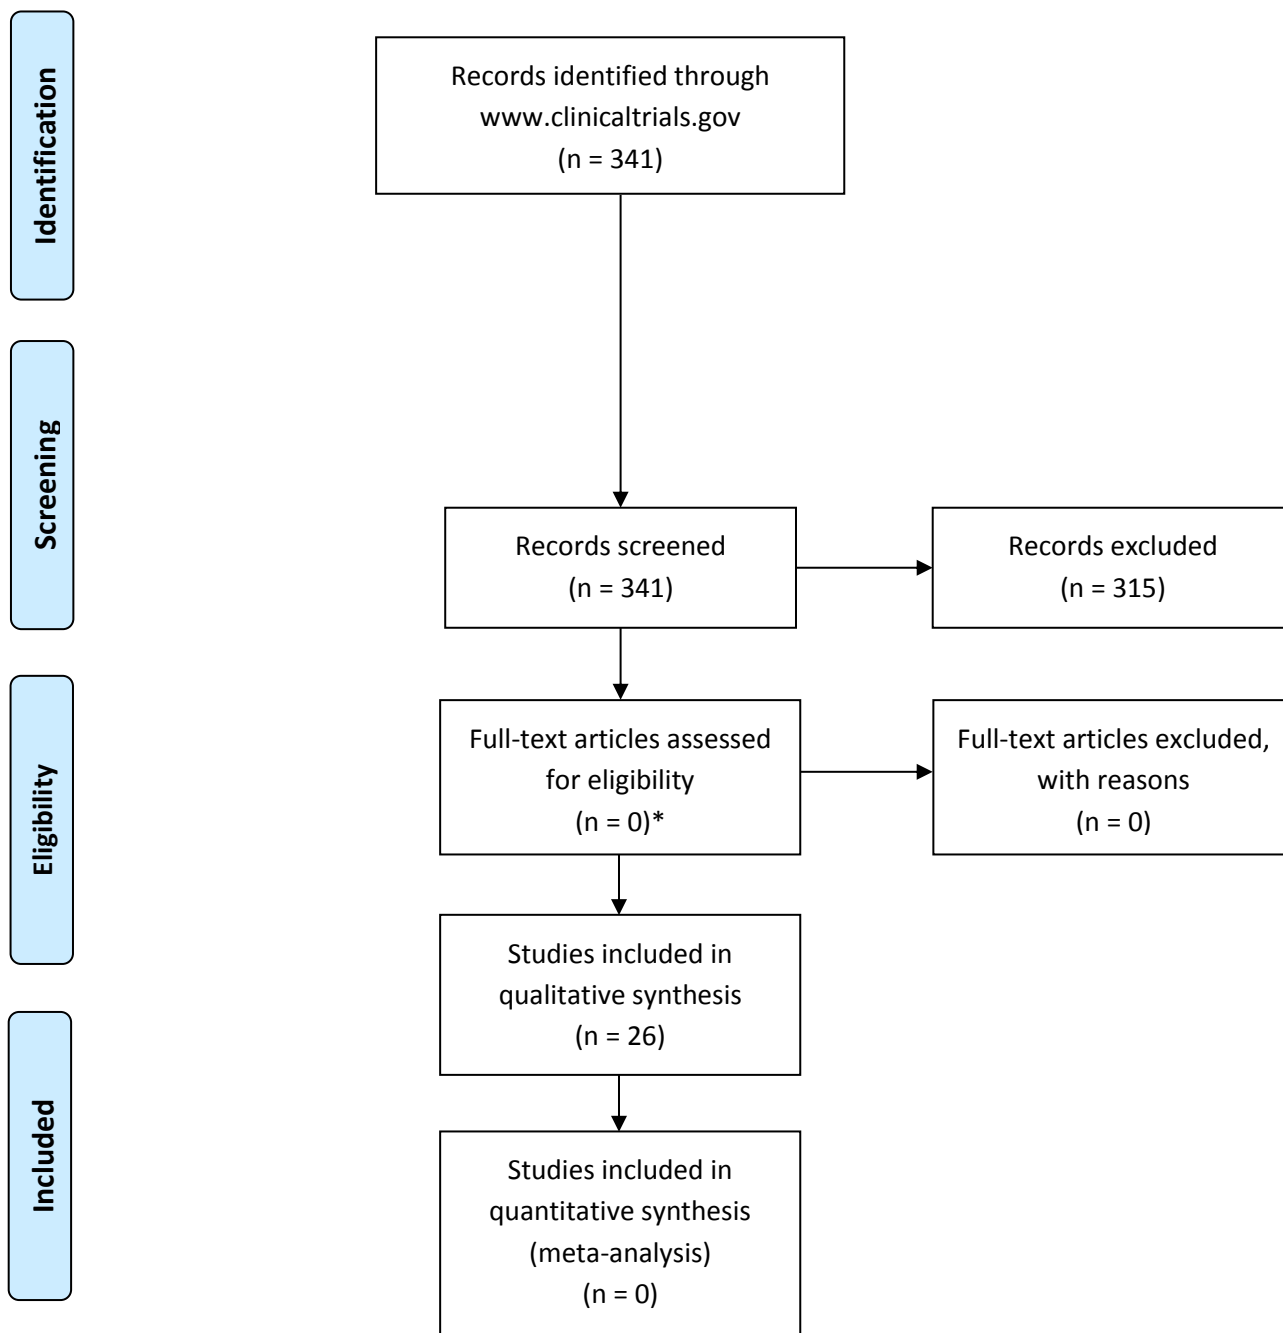

\*There was no published articles within the [www.clinicaltrials.gov](http://www.clinicaltrials.gov) database

Appendix 1: PRISMA Flow diagram (Adapted from Moher *et al*<sup>58</sup>) for clinical trials using EPCs as therapeutic agent, registered under [www.clinicaltrials.gov](http://www.clinicaltrials.gov) registry.

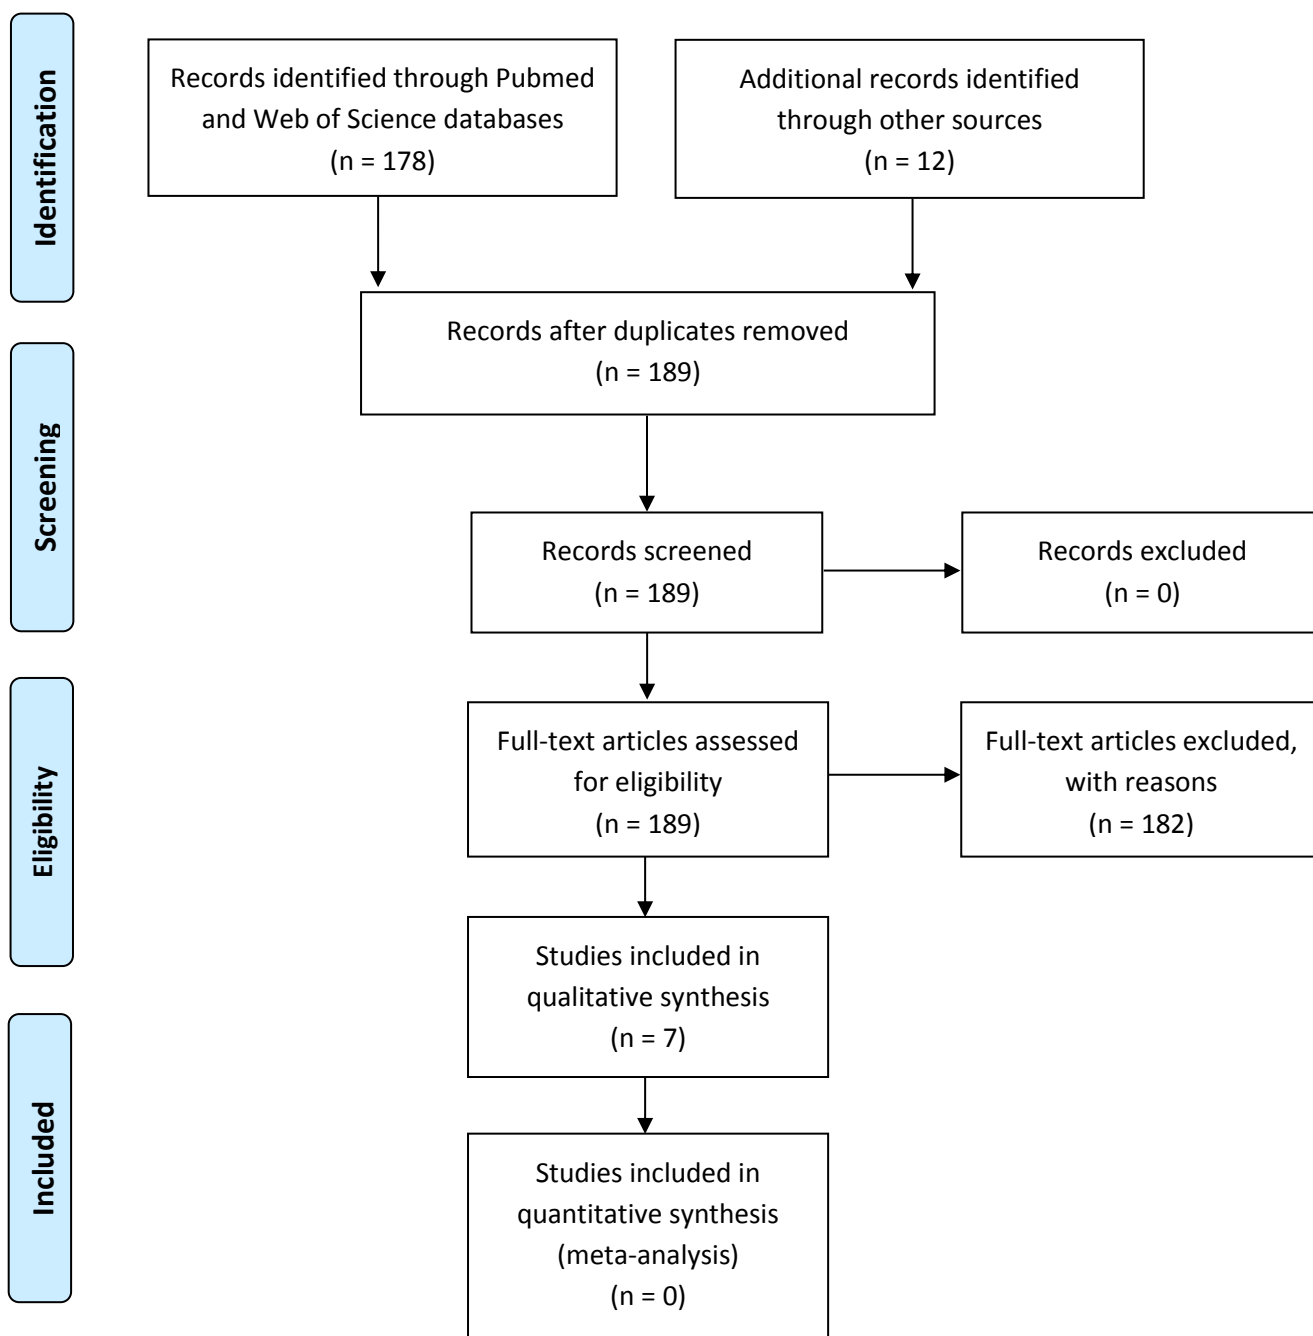

Appendix 2:

PRISMA Flow diagram (Adapted from Moher *et al*<sup>58</sup>) for published studies using EPCs as a therapeutic agent.

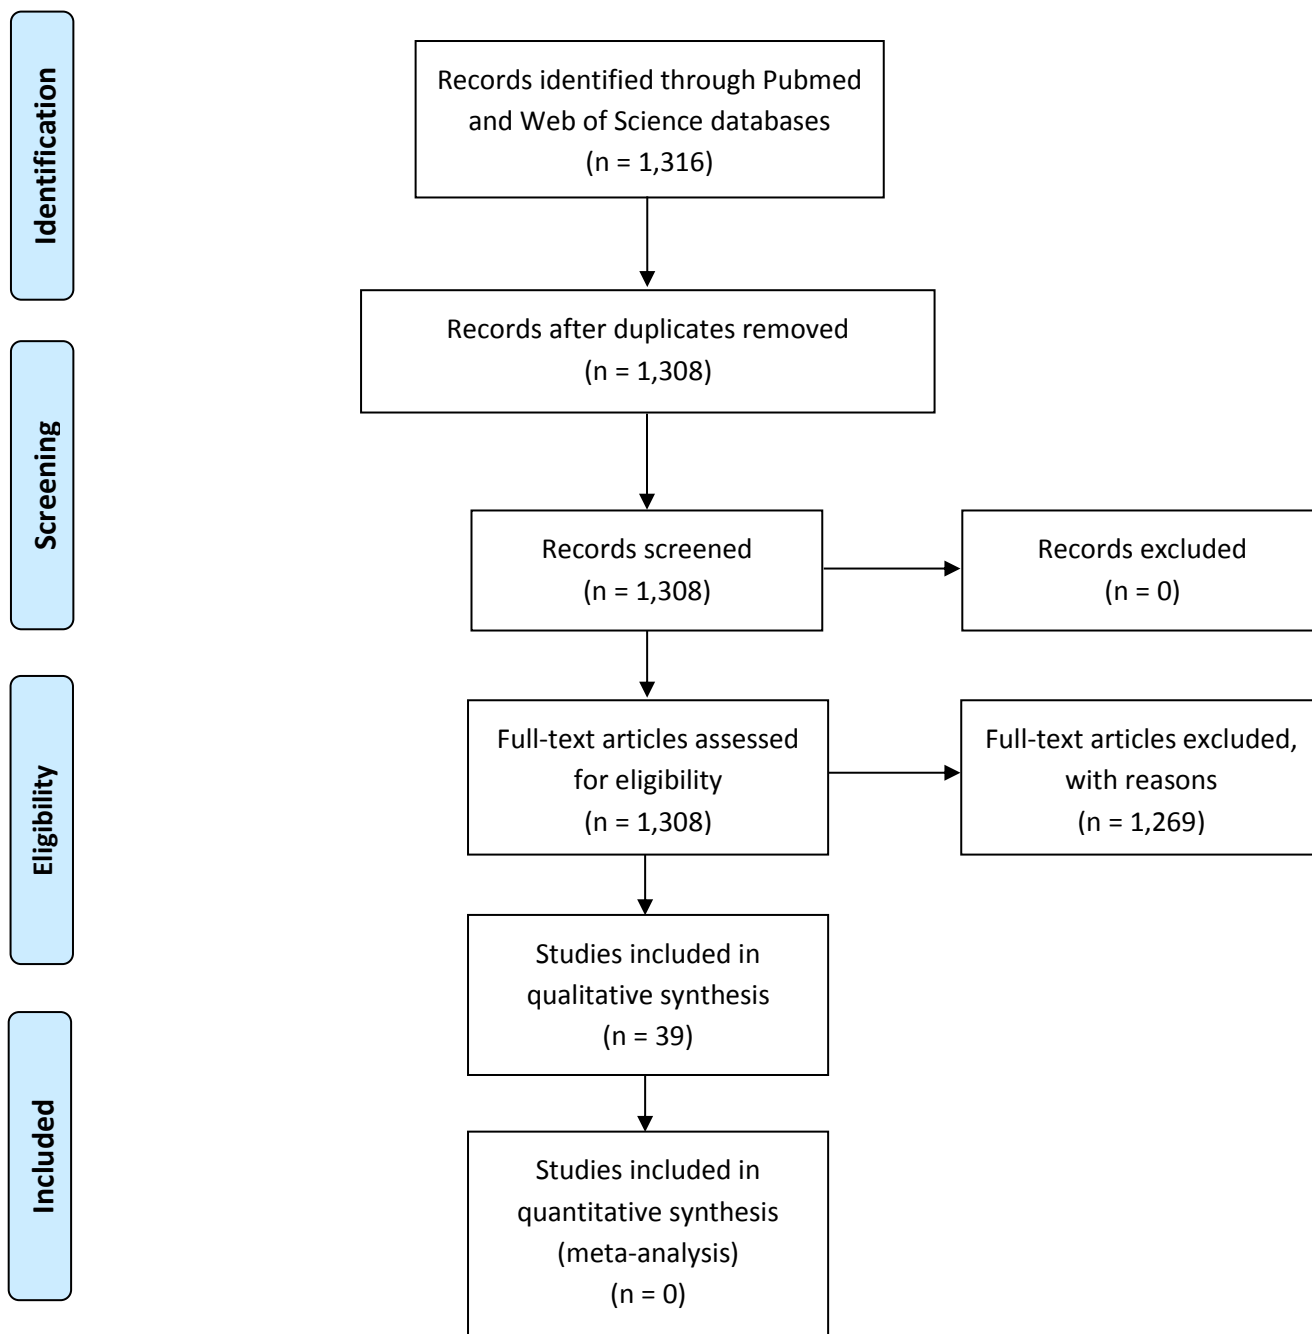

Appendix 3: PRISMA Flow diagram (Adapted from Moher *et al*<sup>58</sup>) for preclinical studies using ECFCs as a therapeutic agent.
