# Supplementary material for: Recent Advances in Endothelial Progenitor Cells Toward Their Use in Clinical Translation
Source: PubMed Central journal article supplement (PMC6305310; doi:10.3389/fmed.2018.00354), 2018-12-18
Supplement: Table_1.pdf [file Table_1.pdf]

Supplementary Table 1: Published studies using EPCs as a therapeutic agent.

| Condition                   | Treatment                                                                 | Source | Culture Conditions                                                         | Cell Type                                                                                                                                                                                                | n  | Outcome                                                               | Reference                                 |
|-----------------------------|---------------------------------------------------------------------------|--------|----------------------------------------------------------------------------|----------------------------------------------------------------------------------------------------------------------------------------------------------------------------------------------------------|----|-----------------------------------------------------------------------|-------------------------------------------|
| Liver Cirrhosis             | Single injection of autologous EPCs into the hepatic artery               | BM     | Cultured on fibronectin with endothelial complete medium                   | CD31, CD34 <sup>+</sup> , CD14, VEGFR2 <sup>+</sup> , VEGFR1 <sup>+</sup> , CD133 <sup>+</sup> , CD90, CD117 <sup>+</sup> , vWF <sup>+</sup> , CXCR4 <sup>+</sup> , CD45 <sup>+</sup> , ID1 <sup>+</sup> | 12 | Treatment was safe and showed an improvement in liver function        | D'Avola <i>et al</i> <sup>21</sup>        |
| CLI                         | Autologous EPC injected IM into the ischemic site                         | PB     | Cells were injected 24hrs after apheresis without any culture              | CD34 <sup>+</sup> , CD133 <sup>+</sup>                                                                                                                                                                   | 28 | Decreased pain scores and increased amputation-free rate.             | Lara-Hernandez <i>et al</i> <sup>17</sup> |
| Non-Healing Diabetic Ulcers | Autologous EPCs were injected IM within 20 cm surrounding the wound       | PB     | Cells were injected on the same day as isolation with no culture           | CD34 <sup>+</sup>                                                                                                                                                                                        | 5  | Increased vascular perfusion and wound closure & safety               | Tanaka <i>et al</i> <sup>18</sup>         |
| STEMI                       | Autologous thymosin β4 treated EPCs were injected into distal part of IRA | PB     | Cultured on fibronectin with Medium-199 + 20% patient serum + 50ng/ml VEGF | NR                                                                                                                                                                                                       | 10 | Increased exercise function and left ventricular function & safety    | Zhu <i>et al</i> <sup>19</sup>            |
| Idiopathic PAH              | IV infusion of autologous EPCs                                            | PB     | Cultured on fibronectin with Medium-199 + 20% patient serum + 50ng/ml VEGF | NR                                                                                                                                                                                                       | 13 | Significant increase in exercise capacity and pulmonary haemodynamics | Zhu <i>et al</i> <sup>20</sup>            |
| PAH                         | eNOS-EPCs injected into the right atrium via a catheter                   | PB     | Cultured on fibronectin                                                    | CD14 <sup>+</sup> , CD31 <sup>+</sup>                                                                                                                                                                    | 7  | Significant improvement in 6 minute walk test after 3 months          | Granton <i>et al</i> <sup>32</sup>        |
| Traumatic Bone Defect       | EPCs in a 3-dimensional tissue engineered bone equivalent scaffold        | PB     | Cultured in EGM-2 in uncoated flasks                                       | CD105 <sup>+</sup> , CD90 <sup>+</sup> , CD73 <sup>+</sup> , CD271 <sup>+</sup> , CD31 <sup>+</sup> , CD34 <sup>+</sup> , CD45 <sup>-</sup> , HLA-DR <sup>-</sup>                                        | 20 | Bone restoration after 5-6 months                                     | Vasyliov <i>et al</i> <sup>33</sup>       |

BM = Bone Marrow, CLI = Critical Limb Ischaemia, eNOS = Endothelial Nitric Oxide Synthase, EPC = Endothelial Progenitor Cell, IM = Intramuscular, PAH = Pulmonary Arterial Hypertension, IRA = Infarct Related Artery, IV = Intravenous, PB = Peripheral Blood, STEMI = ST Segment Elevated Myocardial Infarction, VEGFR = Vascular Endothelial Growth Factor Receptor, vWF = Von Willebrands Factor.
